# Supplementary material for: Association of vitamin D intake during pregnancy with small vulnerable newborns: a population-based cohort study
Source: Royal Society of Chemistry journal article supplement (doi:10.1039/d4fo01110d), 2024-01-01
Supplement: d4fo01110d1.pdf [file d4fo01110d1.pdf]

**Association of vitamin D intake during pregnancy with small  
vulnerable newborns: a population-based cohort study**

Shanshan Wang <sup>1</sup>, Gabriela Maria Villagrán Escobar <sup>1</sup>, Ziyu Chen <sup>1</sup>, Xiu Li <sup>2</sup>,  
Guoping Xiong <sup>3</sup>, Xuefeng Yang <sup>1</sup>, Jian Shen <sup>3\*</sup>, Liping Hao <sup>1\*</sup>

<sup>1</sup> Department of Nutrition and Food Hygiene, Hubei Key Laboratory of Food Nutrition and Safety, MOE Key Laboratory of Environment and Health, School of Public Health, Tongji Medical College, Huazhong University of Science and Technology

<sup>2</sup> Hospital of Tongji Medical College, Huazhong University of Science and Technology

<sup>3</sup> Department of Obstetrics and Gynecology, The Central Hospital of Wuhan

**\*Corresponding authors:** Liping Hao, E-mail: haolp@mails.tjmu.edu.cn

Jian Shen, E-mail: Bwsj1116@163.com

## Contents

**Supplementary Table 1** Basic characteristics of participants included in the analysis and those excluded

**Supplementary Table 2** Dietary food and nutrient intake according to the quartiles of total vitamin D intake in the first and second trimesters

**Supplementary Table 3** Association between dietary vitamin D intake (per SD increase) from different food sources and risk of small vulnerable newborns in the first and second trimesters

**Supplementary Figure 1** Flow chart for the selection of participants included in the analysis

**Supplementary Figure 2** Distribution of dietary vitamin D intake from different food sources in the first and second trimesters

**Supplementary Figure 3** Stratified analyses for association of total vitamin D intake in the first trimester with the risk of small vulnerable newborns

**Supplementary Figure 4** Stratified analyses for association of total vitamin D intake in the second trimester with the risk of small vulnerable newborns

**Supplementary Figure 5** Association of vitamin D intake in the first and second trimesters with the risk of small vulnerable newborns when additionally adjusted for aMed score

**Supplementary Figure 6** Restricted cubic spline analyses for association of vitamin D supplementation in the first and second trimesters with the risk of small vulnerable newborns

**Supplementary Figure 7** Restricted cubic spline analyses for association of dietary vitamin D intake in the first and second trimesters with the risk of small vulnerable newborns

**Supplementary Table 1** Basic characteristics of participants included in the analysis and those excluded<sup>1</sup>

| Characteristic                         | Overall     | Included participants | Excluded participants | <i>P</i> value |
|----------------------------------------|-------------|-----------------------|-----------------------|----------------|
| N                                      | 3566        | 2980                  | 586                   |                |
| Age (years)                            | 29.0 ± 3.6  | 29.0 ± 3.5            | 29.2 ± 3.7            | 0.245          |
| Pre-pregnancy BMI (kg/m <sup>2</sup> ) | 21.1 ± 2.9  | 21.2 ± 3.0            | 21.0 ± 2.7            | 0.113          |
| Gestational weight gain (kg)           | 15.1 ± 5.3  | 15.1 ± 5.3            | 15.2 ± 5.3            | 0.895          |
| Ethnicity (Han Chinese)                | 3486 (97.8) | 2916 (97.9)           | 570 (97.3)            | 0.473          |
| Education levels (years)               |             |                       |                       | 0.084          |
| ≤ 9                                    | 274 (7.7)   | 215 (7.2)             | 59 (10.1)             |                |
| 10–12                                  | 531 (14.9)  | 440 (14.8)            | 91 (15.5)             |                |
| 13–15                                  | 1113 (31.2) | 931 (31.2)            | 182 (31.1)            |                |
| ≥ 16                                   | 1648 (46.2) | 1394 (46.8)           | 254 (43.3)            |                |
| Monthly incomes (CNY)                  |             |                       |                       | 0.446          |
| ≤ 3000                                 | 61 (1.7)    | 53 (1.8)              | 8 (1.4)               |                |
| 3000–4999                              | 509 (14.3)  | 414 (13.9)            | 95 (16.2)             |                |
| 5000–9999                              | 1956 (54.9) | 1644 (55.2)           | 312 (53.2)            |                |
| ≥ 10000                                | 1040 (29.2) | 869 (29.2)            | 171 (29.2)            |                |
| Season                                 |             |                       |                       | <0.001         |
| Winter                                 | 998 (28.0)  | 888 (29.8)            | 110 (18.8)            |                |
| Spring                                 | 883 (24.8)  | 696 (23.4)            | 187 (31.9)            |                |
| Summer                                 | 971 (27.2)  | 800 (26.8)            | 171 (29.2)            |                |
| Fall                                   | 714 (20.0)  | 596 (20.0)            | 118 (20.1)            |                |
| Primiparity (yes)                      | 2721 (76.3) | 2292 (76.9)           | 429 (73.2)            | 0.061          |
| Smoking (yes)                          | 92 (2.6)    | 79 (2.7)              | 13 (2.2)              | 0.645          |
| Alcohol drinking (yes)                 | 233 (6.5)   | 183 (6.1)             | 50 (8.5)              | 0.040          |
| Regular exercise (yes)                 | 1424 (39.9) | 1208 (40.5)           | 216 (36.9)            | 0.106          |
| Outdoor activities (yes)               | 1882 (52.8) | 1597 (53.6)           | 285 (48.6)            | 0.031          |
| Sun protection (yes)                   | 651 (18.3)  | 567 (19.0)            | 84 (14.3)             | 0.009          |

<sup>1</sup>Continuous variables were presented as means ± SDs for normally distributed variables and medians (interquartile ranges) for non-normally distributed variables; categorical variables were presented as n (%).

BMI, body mass index; CNY, Chinese Yuan.

**Supplementary Table 2** Dietary food and nutrient intake according to the quartiles of total vitamin D intake in the first and second trimesters<sup>1</sup>

|                                        | First trimester            |                            |                            |                | Second trimester           |                            |                            |                |
|----------------------------------------|----------------------------|----------------------------|----------------------------|----------------|----------------------------|----------------------------|----------------------------|----------------|
|                                        | Overall                    | Q1                         | Q4                         | <i>P</i> value | Overall                    | Q1                         | Q4                         | <i>P</i> value |
| <b>N</b>                               | 2049                       | 513                        | 512                        |                | 1446                       | 362                        | 362                        |                |
| <b>Foods and total energy intake</b>   |                            |                            |                            |                |                            |                            |                            |                |
| Grains (g/d)                           | 220.00 (172.46, 275.00)    | 226.57 (177.50, 284.00)    | 204.30 (165.62, 254.29)    | <0.001         | 271.49 (216.33, 314.24)    | 279.36 (227.28, 324.64)    | 260.36 (213.26, 302.14)    | 0.005          |
| Vegetables (g/d)                       | 268.21 (180.36, 382.14)    | 275.93 (184.46, 417.86)    | 254.76 (180.00, 372.36)    | 0.014          | 309.83 (227.15, 408.69)    | 307.57 (230.23, 407.83)    | 319.02 (222.26, 429.58)    | 0.589          |
| Fruits (g/d)                           | 396.07 (271.07, 546.25)    | 382.14 (263.21, 531.61)    | 390.00 (272.94, 548.04)    | 0.501          | 410.20 (290.78, 566.07)    | 403.30 (279.82, 573.04)    | 433.40 (307.95, 564.64)    | 0.443          |
| Meats (g/d)                            | 32.86 (15.00, 56.43)       | 33.39 (13.57, 54.50)       | 36.43 (17.14, 60.09)       | 0.003          | 51.07 (32.14, 75.00)       | 47.50 (30.09, 70.98)       | 53.21 (33.66, 75.67)       | 0.009          |
| Aquatic products (g/d)                 | 17.86 (7.50, 34.29)        | 16.04 (6.43, 31.43)        | 22.05 (10.71, 42.86)       | <0.001         | 27.18 (14.29, 48.57)       | 22.86 (10.71, 40.00)       | 33.18 (18.59, 56.07)       | <0.001         |
| Eggs (g/d)                             | 28.57 (12.50, 50.00)       | 25.00 (11.43, 50.00)       | 40.00 (17.86, 50.00)       | <0.001         | 40.00 (20.00, 50.00)       | 31.79 (14.29, 50.00)       | 40.00 (25.00, 50.00)       | <0.001         |
| Legumes (g/d)                          | 6.00 (2.57, 11.43)         | 6.00 (2.29, 12.00)         | 6.00 (2.57, 10.89)         | 0.859          | 6.00 (2.86, 10.71)         | 6.07 (2.86, 10.96)         | 6.43 (2.89, 11.30)         | 0.623          |
| Nuts (g/d)                             | 8.43 (2.68, 16.86)         | 7.14 (1.79, 15.00)         | 8.57 (2.86, 18.21)         | 0.002          | 11.79 (4.71, 20.71)        | 10.12 (2.95, 20.22)        | 12.14 (5.65, 20.86)        | 0.070          |
| Dairy products (g/d)                   | 132.14 (50.00, 250.00)     | 107.14 (40.00, 200.00)     | 225.71 (123.58, 292.86)    | <0.001         | 208.21 (100.00, 285.71)    | 139.29 (55.53, 250.00)     | 231.07 (139.46, 321.43)    | <0.001         |
| Total energy (kcal/d)                  | 1808.00 (1495.03, 2124.39) | 1820.62 (1479.78, 2167.15) | 1780.87 (1537.06, 2099.42) | 0.054          | 2134.10 (1847.80, 2449.56) | 2121.91 (1821.72, 2399.98) | 2122.82 (1857.81, 2417.47) | 0.606          |
| <b>Energy-adjusted nutrient intake</b> |                            |                            |                            |                |                            |                            |                            |                |
| Protein (g/d)                          | 51.23 (46.99, 55.95)       | 49.72 (45.77, 54.27)       | 53.97 (50.31, 59.11)       | <0.001         | 60.77 (56.13, 66.59)       | 58.72 (54.79, 63.34)       | 63.75 (58.24, 69.46)       | <0.001         |
| Fat (g/d)                              | 61.96 (52.63, 71.82)       | 61.56 (51.39, 70.57)       | 65.52 (55.61, 75.70)       | <0.001         | 76.01 (65.81, 86.07)       | 73.25 (62.75, 82.24)       | 76.92 (67.29, 87.81)       | <0.001         |
| Carbohydrates (g/d)                    | 265.23 (242.19, 287.53)    | 267.43 (246.55, 291.33)    | 256.41 (229.40, 277.61)    | <0.001         | 299.61 (275.90, 323.58)    | 308.09 (287.06, 334.71)    | 294.95 (269.84, 317.19)    | <0.001         |
| Cholesterol (mg/d)                     | 270.75 (167.05, 368.44)    | 250.61 (156.81, 337.54)    | 338.61 (222.98, 432.17)    | <0.001         | 331.26 (234.71, 422.27)    | 290.94 (201.92, 384.49)    | 374.19 (284.94, 445.85)    | <0.001         |
| Vitamin A (ug/d)                       | 671.20 (510.08, 872.36)    | 662.08 (485.07, 845.63)    | 711.65 (544.81, 902.41)    | 0.002          | 806.08 (623.29, 1057.44)   | 764.01 (603.43, 1002.97)   | 837.56 (638.11, 1142.67)   | 0.008          |
| Vitamin C (mg/d)                       | 159.74 (125.70, 202.44)    | 159.88 (120.02, 200.53)    | 157.50 (124.82, 194.82)    | 0.301          | 170.93 (134.69, 215.75)    | 166.30 (133.34, 217.94)    | 178.41 (141.82, 222.78)    | 0.305          |

|                   |                         |                         |                         |        |                         |                         |                         |        |
|-------------------|-------------------------|-------------------------|-------------------------|--------|-------------------------|-------------------------|-------------------------|--------|
| Vitamin E (mg/d)  | 35.54 (28.65, 43.88)    | 36.04 (29.49, 44.07)    | 35.16 (28.11, 42.91)    | 0.124  | 40.20 (32.72, 49.47)    | 40.14 (32.41, 50.00)    | 40.24 (32.35, 49.66)    | 0.602  |
| Folic acid (ug/d) | 242.41 (201.21, 296.66) | 229.06 (190.88, 283.06) | 255.97 (210.26, 307.62) | <0.001 | 277.88 (236.82, 333.33) | 270.11 (228.43, 324.46) | 287.59 (247.02, 343.19) | 0.001  |
| Calcium (mg/d)    | 479.37 (385.07, 586.66) | 455.56 (364.60, 555.07) | 549.43 (462.94, 647.11) | <0.001 | 573.25 (474.01, 692.75) | 518.23 (411.96, 629.06) | 626.79 (515.62, 742.31) | <0.001 |
| Iron (mg/d)       | 16.71 (15.52, 18.22)    | 16.64 (15.44, 18.07)    | 16.70 (15.50, 18.12)    | 0.404  | 19.21 (17.87, 20.71)    | 19.00 (17.68, 20.46)    | 19.51 (18.13, 21.01)    | 0.004  |
| Zinc (mg/d)       | 8.95 (8.38, 9.60)       | 8.79 (8.28, 9.36)       | 9.25 (8.69, 9.92)       | <0.001 | 10.69 (10.07, 11.52)    | 10.43 (9.95, 11.19)     | 10.98 (10.28, 11.71)    | <0.001 |
| Selenium (ug/d)   | 31.24 (26.55, 36.58)    | 30.34 (25.78, 34.91)    | 34.89 (29.78, 39.58)    | <0.001 | 37.50 (32.27, 44.04)    | 35.60 (30.85, 41.75)    | 39.78 (34.92, 47.27)    | <0.001 |
| PUFA (g/d)        | 20.45 (15.24, 26.37)    | 20.53 (15.02, 26.79)    | 20.28 (14.92, 26.07)    | 0.369  | 24.73 (18.32, 30.76)    | 24.70 (17.39, 30.31)    | 24.60 (19.04, 30.34)    | 0.075  |

<sup>1</sup>medians (interquartile ranges) were given for non-normally distributed variables and *P* values were from the Kruskal-Wallis rank test. The daily intake of dietary nutrients was adjusted for total energy intake using the nutrient residual method.

Q, quartile; PUFA, polyunsaturated fatty acids.

**Supplementary Table 3** Association between dietary vitamin D intake (per SD increase) from different food sources and risk of small vulnerable newborns in the first and second trimesters<sup>1</sup>

| Food groups                  | LBW               | PTB               | SGA               | SVN               |
|------------------------------|-------------------|-------------------|-------------------|-------------------|
| <b>First trimester</b>       |                   |                   |                   |                   |
| Poultry and livestock meats  | 1.07 (0.85, 1.35) | 0.96 (0.78, 1.18) | 0.84 (0.68, 1.03) | 0.90 (0.77, 1.05) |
| Processed meats              | 1.06 (0.84, 1.34) | 1.01 (0.83, 1.23) | 0.81 (0.60, 1.08) | 0.92 (0.78, 1.09) |
| Aquatic products             | 1.06 (0.85, 1.33) | 1.05 (0.87, 1.27) | 1.09 (0.93, 1.28) | 1.07 (0.95, 1.22) |
| Eggs                         | 0.88 (0.68, 1.14) | 0.84 (0.68, 1.04) | 1.02 (0.85, 1.22) | 0.94 (0.82, 1.09) |
| Dairy products               | 1.23 (0.99, 1.53) | 1.19 (0.99, 1.43) | 0.88 (0.72, 1.08) | 1.00 (0.86, 1.15) |
| Fungus                       | 0.96 (0.71, 1.30) | 1.02 (0.84, 1.24) | 0.96 (0.79, 1.17) | 0.99 (0.86, 1.14) |
| Salad dressing and ice cream | 0.96 (0.75, 1.24) | 1.09 (0.94, 1.26) | 1.13 (0.99, 1.29) | 1.13 (1.02, 1.26) |
| <b>Second trimester</b>      |                   |                   |                   |                   |
| Poultry and livestock meats  | 0.85 (0.57, 1.28) | 1.02 (0.75, 1.37) | 1.14 (0.91, 1.44) | 1.08 (0.89, 1.30) |
| Processed meats              | 0.82 (0.41, 1.65) | 0.53 (0.23, 1.24) | 0.99 (0.78, 1.26) | 0.90 (0.69, 1.17) |
| Aquatic products             | 1.24 (0.90, 1.70) | 1.27 (0.98, 1.63) | 0.80 (0.60, 1.06) | 0.99 (0.82, 1.20) |
| Eggs                         | 0.87 (0.59, 1.28) | 1.07 (0.80, 1.42) | 0.96 (0.76, 1.22) | 1.01 (0.84, 1.22) |
| Dairy products               | 1.03 (0.79, 1.35) | 1.02 (0.86, 1.22) | 0.92 (0.60, 1.42) | 0.99 (0.84, 1.16) |
| Fungus                       | 0.64 (0.37, 1.12) | 1.17 (0.93, 1.48) | 0.89 (0.66, 1.18) | 1.03 (0.85, 1.24) |
| Salad dressing and ice cream | 0.82 (0.43, 1.56) | 1.14 (0.88, 1.48) | 0.82 (0.53, 1.27) | 0.99 (0.78, 1.27) |

<sup>1</sup>Values were represented as ORs (95% CIs) from logistic regression models and were adjusted for age, prepregnancy BMI, gestational weight gain, nation, education levels, monthly incomes, primiparity, smoking, drinking, season, regular exercise, outdoor activities, sun protection, iron supplement use, neonatal sex, labor way, total energy intake, and dietary vitamin D intake from other food groups.

LBW, low birth weight; PTB, preterm birth; SGA, small for gestational age; SVN, small vulnerable newborns.

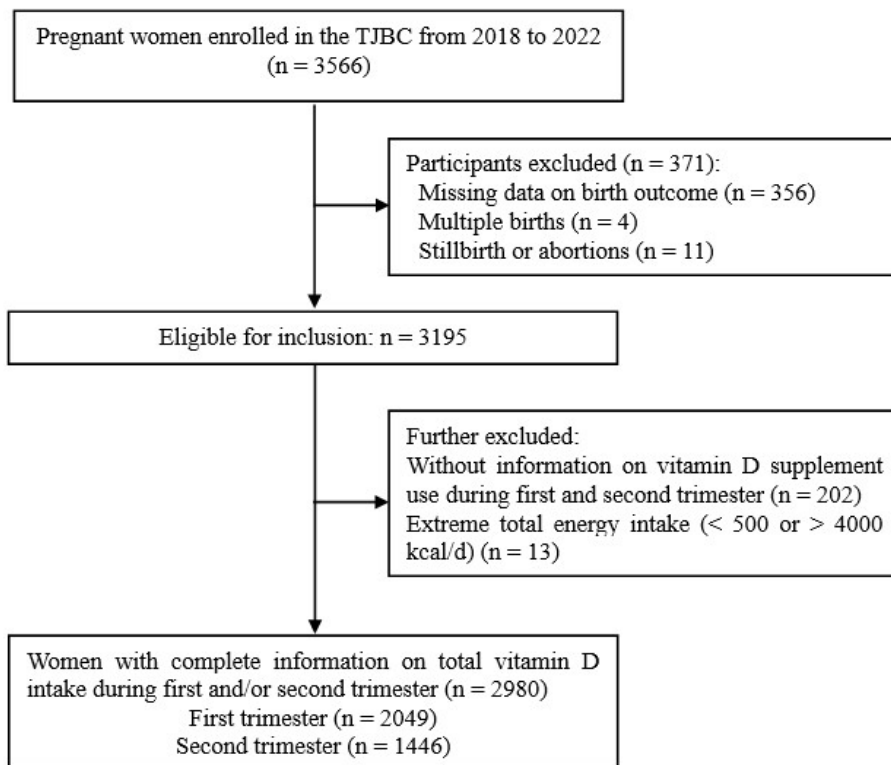

**Supplementary Figure 1** Flow chart for the selection of participants included in the analysis

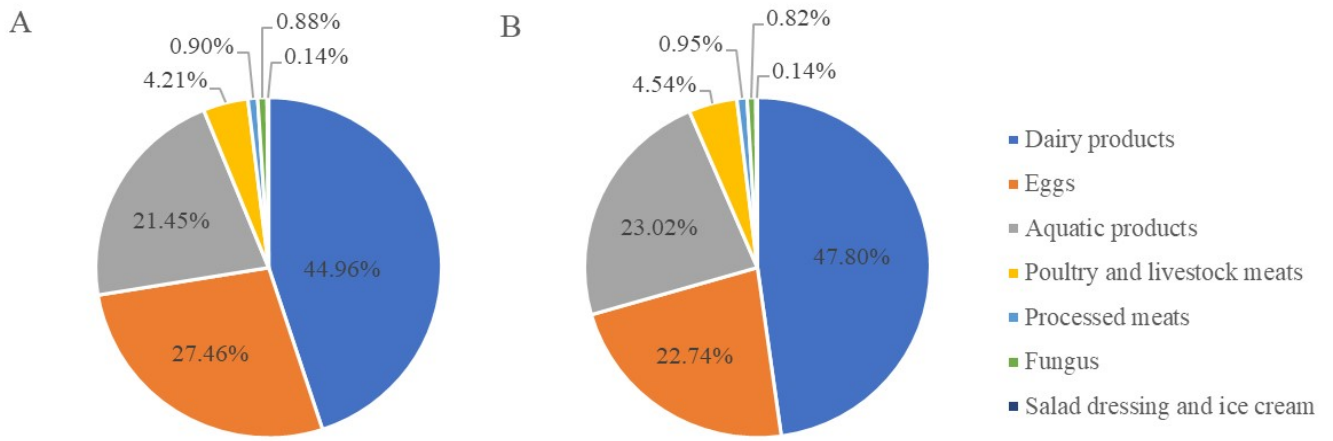

**Supplementary Figure 2** Distribution of dietary vitamin D intake from different food sources in the first (A) and second trimester (B)



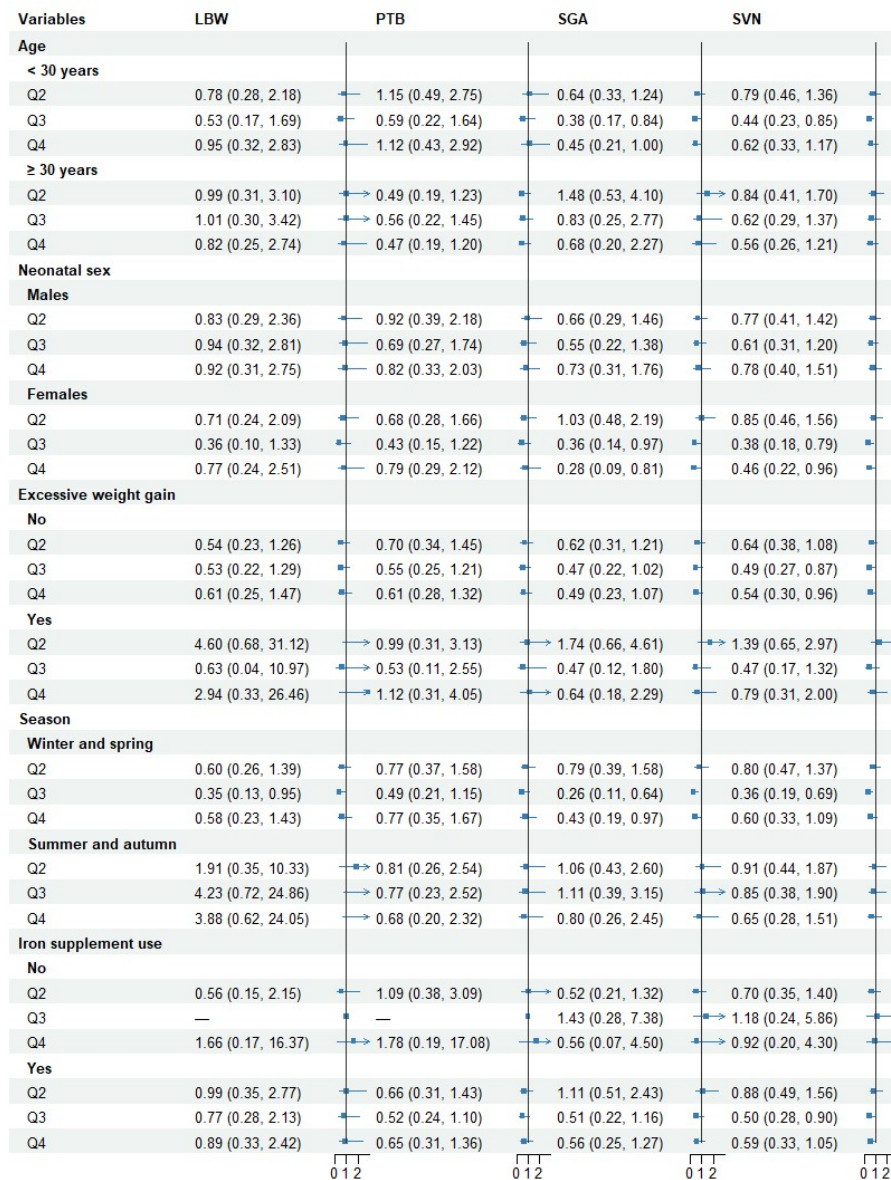

**Supplementary Figure 3 Stratified analyses for association of total vitamin D intake in the first trimester with the risk of small vulnerable newborns**

Values were represented as ORs (95% CIs) from logistic regression models and were adjusted for age, prepregnancy BMI, gestational weight gain, nation, education levels, monthly incomes, primiparity, smoking, drinking, season, regular exercise, outdoor activities, sun protection, iron supplement use, neonatal sex, labor way, and total energy intake. The lowest quartile (Q1) was applied as a reference.

"—" indicates that the sample size of this group is small and the model can not fit effectively.

LBW, low birth weight; PTB, preterm birth; Q, quartile; SGA, small for gestational age; SVN, small vulnerable newborns.

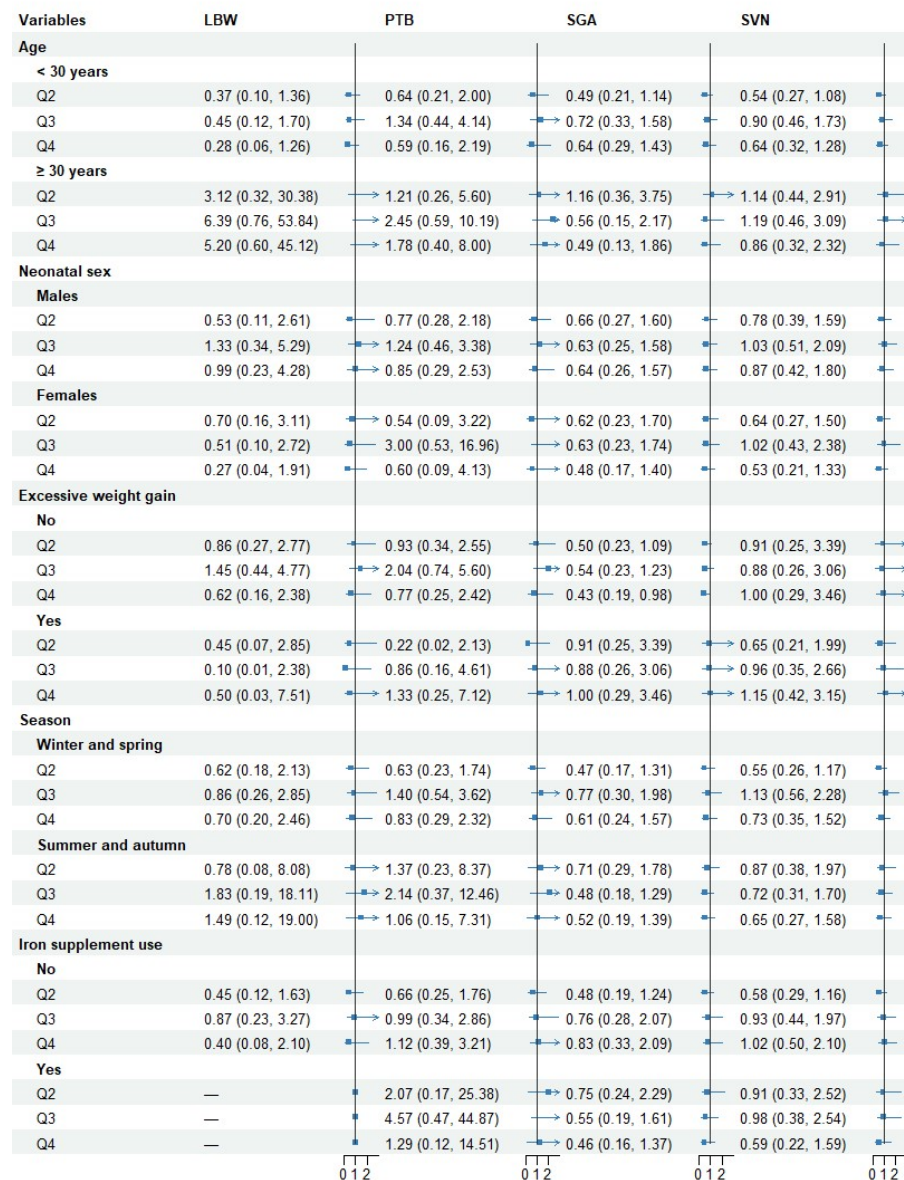

**Supplementary Figure 4 Stratified analyses for association of total vitamin D intake in the second trimester with the risk of small vulnerable newborns**

Values were represented as ORs (95% CIs) from logistic regression models and were adjusted for age, prepregnancy BMI, gestational weight gain, nation, education levels, monthly incomes, primiparity, smoking, drinking, season, regular exercise, outdoor activities, sun protection, iron supplement use, neonatal sex, labor way, and total energy intake. The lowest quartile (Q1) was applied as a reference.

"—" indicates that the sample size of this group is small and the model can not fit effectively.

LBW, low birth weight; PTB, preterm birth; Q, quartile; SGA, small for gestational age; SVN, small vulnerable newborns.

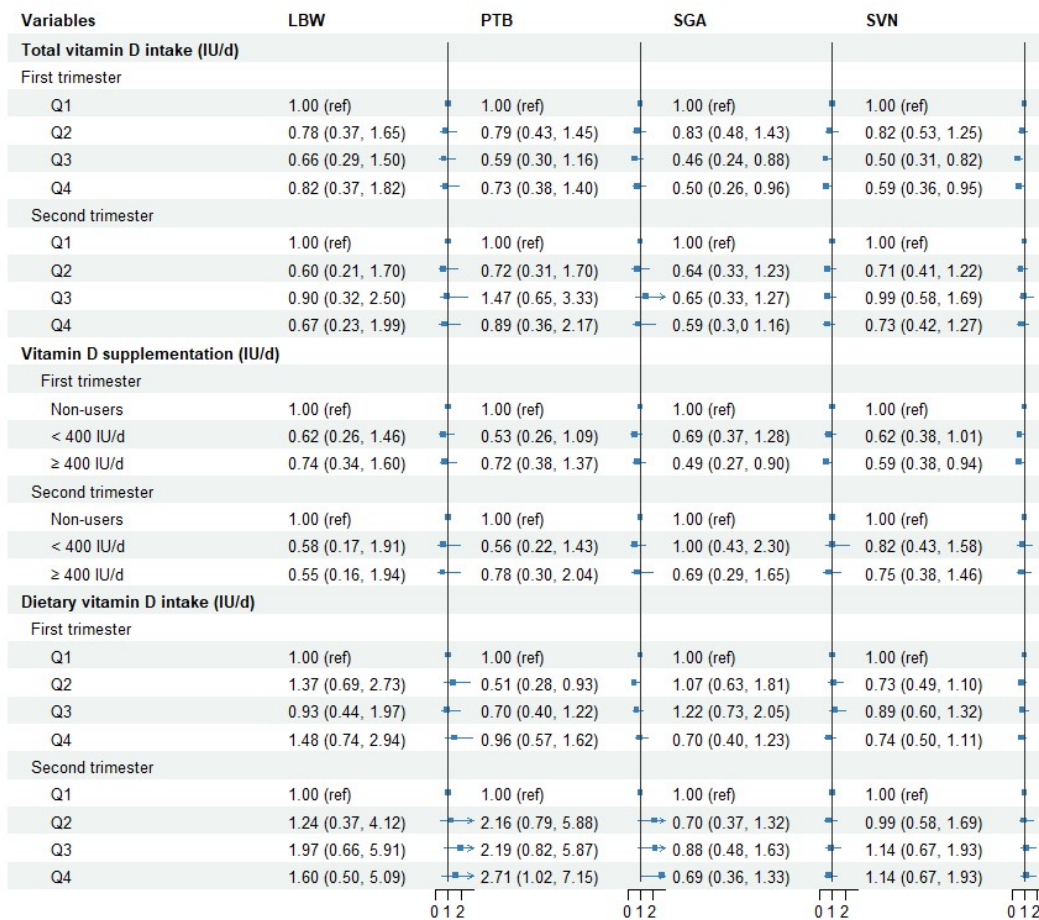

**Supplementary Figure 5 Association of vitamin D intake in the first and second trimesters with the risk of small vulnerable newborns when additionally adjusted for aMed score**

Values were represented as ORs (95% CIs) from logistic regression models and were adjusted for aMed, age, prepregnancy BMI, gestational weight gain, nation, education levels, monthly incomes, primiparity, smoking, drinking, season, regular exercise, outdoor activities, sun protection, iron supplement use, neonatal sex, labor way, and total energy intake. The lowest quartile (Q1) was applied as a reference.

aMed, alternate Mediterranean diet score; LBW, low birth weight; PTB, preterm birth; Q, quartile; SGA, small for gestational age; SVN, small vulnerable newborns.

**A**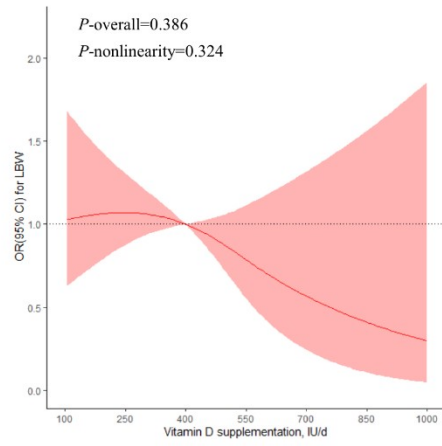**B**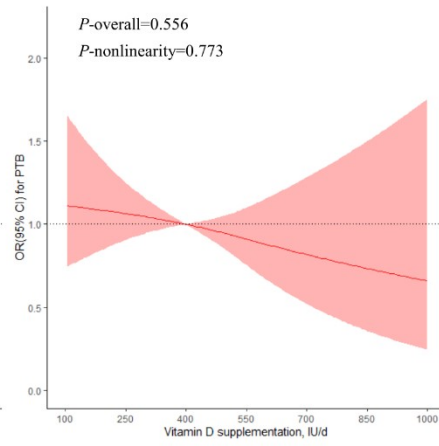**C**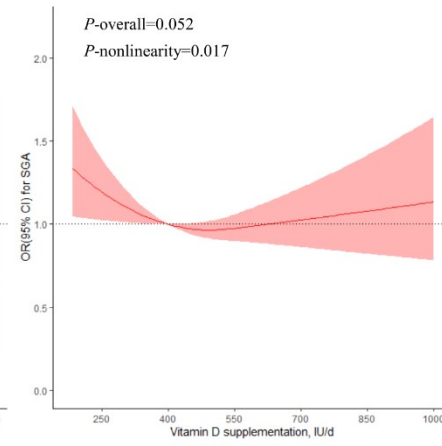**D**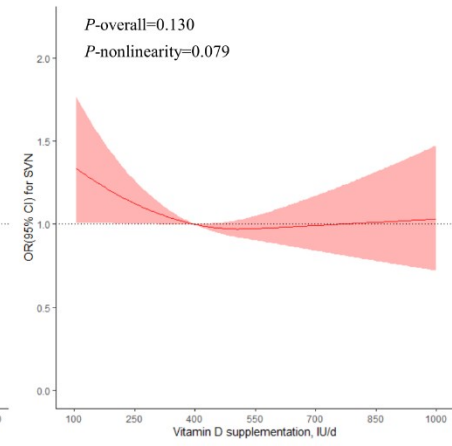**E**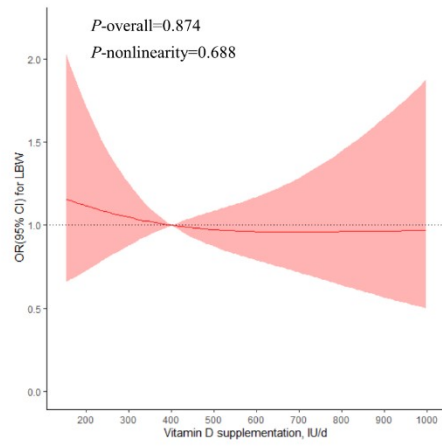**F**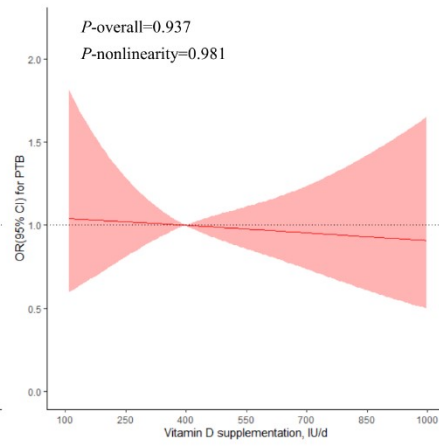**G**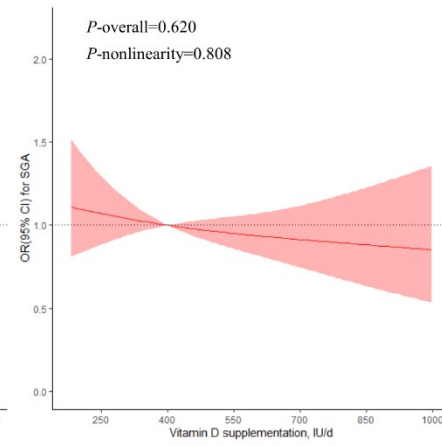**H**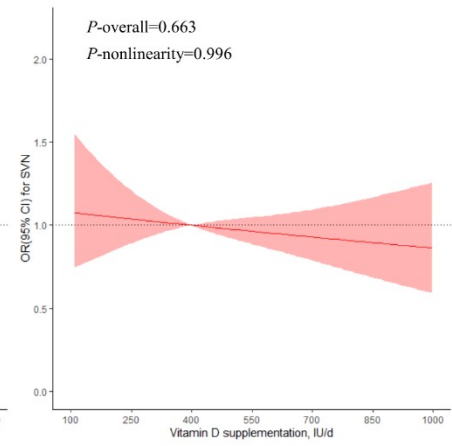

**Supplementary Figure 6 Restricted cubic spline analyses for association of vitamin D supplementation in the first and second trimesters with the risk of small vulnerable newborns**

Figures 5A-5D show the correlation between vitamin D supplementation in the first trimester and the risk of LBW, PTB, SGA and SVN, respectively. Figures 5E-5H show the correlation between vitamin D supplementation in the second trimester and the risk of LBW, PTB, SGA and SVN, respectively. In the Odd ratios (solid lines) and 95% CIs (shaded areas) were adjusted for age, prepregnancy BMI, gestational weight gain, nation, education levels, monthly incomes, primiparity, smoking, drinking, season, regular exercise, outdoor activities, sun protection, iron supplement use, neonatal sex, labor way, total energy intake, and dietary vitamin D intake. Knots were placed at the 10th, 50th, and 90th percentiles, and the reference value was set at the intake of 400 IU/d.

LBW, low birth weight; PTB, preterm birth; SGA, small for gestational age; SVN, small vulnerable newborns.



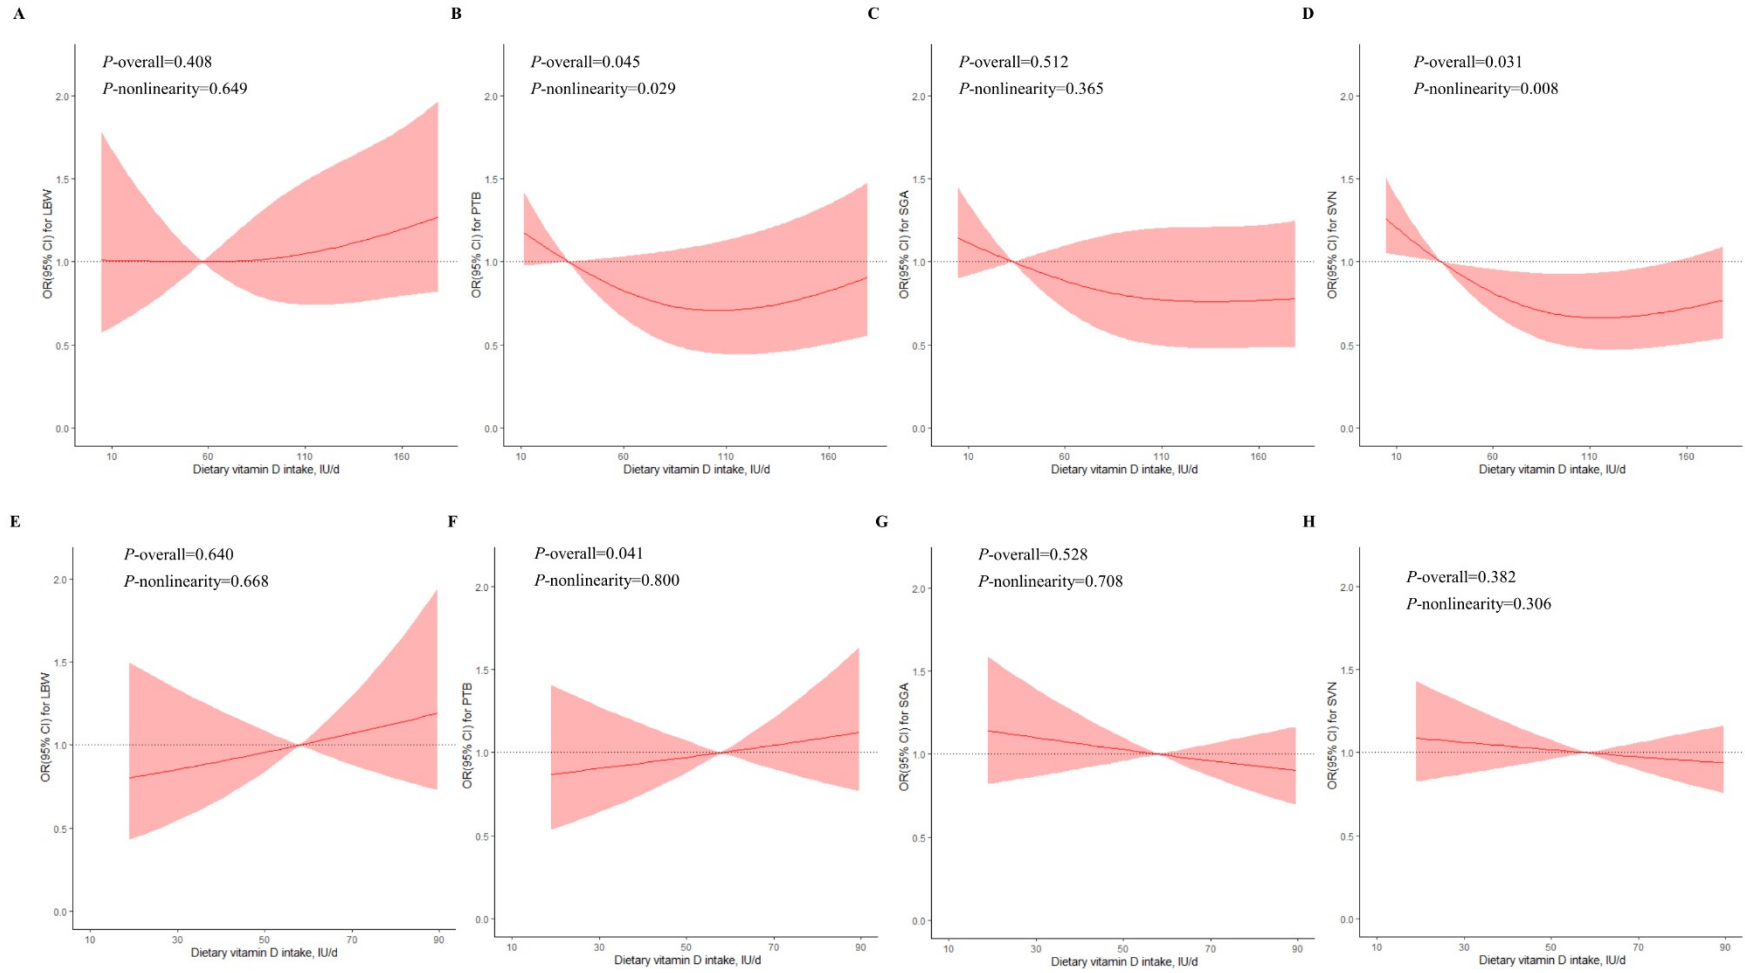

**Supplementary Figure 7 Restricted cubic spline analyses for association of dietary vitamin D intake in the first and second trimesters with the risk of small vulnerable newborns**

Figures 6A-6D show the correlation between dietary vitamin D intake in the first trimester and the risk of LBW, PTB, SGA and SVN, respectively. Figures 6E-6H show the correlation between dietary vitamin D intake in the second trimester and the risk of LBW, PTB, SGA and SVN, respectively. In the Odd ratios (solid lines) and 95% CIs (shaded areas) were adjusted for age, prepregnancy BMI, gestational weight gain, nation, education levels, monthly incomes, primiparity, smoking, drinking, season, regular exercise, outdoor activities, sun protection, iron supplement use, neonatal sex, labor way, total energy intake, and dietary vitamin D intake. Knots were placed at the 10th, 50th, and 90th percentiles, and the reference value was set at the 10th percentiles.

LBW, low birth weight; PTB, preterm birth; SGA, small for gestational age; SVN, small vulnerable newborns.
